# Supplementary material for: Responses of N2O Production and Abundances of Associated Microorganisms to Soil Profiles and Water Regime in Two Paddy Soils
Source: MDPI journal article supplement (doi:10.3390/agronomy12030743), 2022-03-20
Supplement: s1 [file s1]

## **Supplementary Material for**

**Characteristics and influencing factors of N<sub>2</sub>O emissions from different soil horizons of hydromorphic and gleyed paddy soils**

This file includes:

Supplementary Table S1

## Supplementary Tables

**Table S1** Primer information and reaction programs of quantitative PCR for selected functional genes

| Gene            | Primers     | Primer sequences        | Length | Qpcr programme                                                    | Reference              |
|-----------------|-------------|-------------------------|--------|-------------------------------------------------------------------|------------------------|
| <i>AOA-amoA</i> | Arch-amoAF  | STAATGGTCTGGCTTAGACG    | 635 bp | 95°C, 5min; 40×(94°C, 30s; 58°C, 30s; 72°C, 30s with plate read); | Francis et al., 2005   |
|                 | Arch-amoAR  | GCGGCCATCCATCTGTATGT    |        | Melt curve 60.0°C to 95.0°C, increment 0.3°C                      |                        |
| <i>AOB-amoA</i> | amoA-1F     | GGGGTTTCTACTGGTGGT      | 491 bp | 95°C, 5min; 40×(94°C, 30s; 58°C, 30s; 72°C, 30s with plate read); | Rotthauwe et al., 1997 |
|                 | amoA-2R     | CCCCTCKGSAAAGCCTTCTTC   |        | Melt curve 60.0°C to 95.0°C, increment 0.3°C                      |                        |
| <i>NirK</i>     | nirK876F    | ATYGGCGGVAYGGCGA        | 165 bp | 95°C, 5min; 40×(94°C, 30s; 58°C, 30s; 72°C, 30s with plate read); | Henry et al., 2004     |
|                 | nirK1040R   | GCCTCGATCAGRTTGTGGTT    |        | Melt curve 60.0°C to 95.0°C, increment 0.3°C                      |                        |
| <i>NosZ</i>     | nosZ2FHenry | CGCRACGGCAASAAGGTSMSSGT | 267 bp | 95°C, 5min; 40×(94°C, 30s; 58°C, 30s; 72°C, 30s with plate read); | Henry et al., 2006     |
|                 | nosZ2RHenry | CAKRTGCAKSGCRTGGCAGAA   |        | Melt curve 60.0°C to 95.0°C, increment 0.3°C                      |                        |

**Table S2** The ratios of AOB/AOA and *nirK/nosZ* genes in hydromorphic and gleyed paddy soils after incubating for 21 days

| Soils                      | Layers   | AOB/AOA |         |         | <i>nirK/nosZ</i> |         |         |
|----------------------------|----------|---------|---------|---------|------------------|---------|---------|
|                            |          | 60%WHC  | 100%WHC | 200%WHC | 60%WHC           | 100%WHC | 200%WHC |
| Hydromorphic<br>paddy soil | 0-10 cm  | 4.21    | 10.02   | 15.37   | 6.06             | 7.38    | 7.66    |
|                            | 10-20 cm | 4.58    | 19.91   | 23.65   | 5.78             | 7.40    | 4.89    |
|                            | 20-40 cm | 6.18    | 14.98   | 37.01   | 2.61             | 4.59    | 3.02    |
| Gley paddy soil            | 0-10 cm  | 11.51   | 13.70   | 22.67   | 9.46             | 12.99   | 9.78    |
|                            | 10-20 cm | 4.37    | 37.46   | 43.92   | 6.16             | 9.25    | 8.47    |
|                            | 20-40 cm | 0.64    | 4.28    | 18.78   | 4.03             | 6.02    | 11.17   |
